1 **Molecular Counting with Localization Microscopy: A Bayesian**  
2 **estimate based on single fluorophore statistics**

3 D. Nino,<sup>1,2</sup> N. Rafiei,<sup>2,3</sup> Y. Wang,<sup>4</sup> A. Zilman,<sup>1,3</sup> and J. N. Milstein<sup>1,2,3</sup>

4 <sup>1</sup>*Department of Physics, University of Toronto, Toronto, ON CAN*

5 <sup>2</sup>*Department of Chemical and Physical Sciences,*

6 *University of Toronto Mississauga, Mississauga, ON CAN*

7 <sup>3</sup>*Institute of Biomaterials and Biomedical Engineering,*

8 *University of Toronto, Toronto, ON CAN*

9 <sup>4</sup>*Department of Physics, University of Arkansas, Fayetteville, AR USA*

10 (Dated: March 22, 2017)

### Abstract

Super-resolved localization microscopy (SLM) has the potential to serve as an accurate, single-cell technique for counting the abundance of intracellular molecules. However, the stochastic blinking of single fluorophores can introduce large uncertainties into the final count. Here we provide a theoretical foundation for applying SLM to the problem of molecular counting based on the distribution of blinking events from a single fluorophore. We also show that by redundantly tagging single-molecules with multiple, blinking fluorophores, the accuracy of the technique can be enhanced by harnessing the central limit theorem. The coefficient of variation (CV) then, for the number of molecules  $M$  estimated from a given number of blinks  $B$ , scales like  $\sim 1/\sqrt{N_l}$ , where  $N_l$  is the mean number of labels on a target. As an example, we apply our theory to the challenging problem of quantifying the cell-to-cell variability of plasmid copy number in bacteria.

## 11 I. INTRODUCTION

12 Cell biology is becoming increasingly quantitative with advances in light microscopy strongly  
13 driving this trend. Beyond imaging structure, significant effort has gone into developing  
14 microscopy based approaches to determining the abundance of proteins and nucleic acids  
15 in cells [1, 2]. Molecular counting experiments can yield additional insight into cellular  
16 structure and define the stoichiometry of interacting protein complexes. Moreover, since  
17 microscopy provides information at the single-cell level, it may be used to study stochastic  
18 variation within a population due to varying levels of mRNA and protein copy number, which  
19 is inaccessible to bulk techniques [3]. This variability is thought to be a crucial component of  
20 many biological processes such as cellular differentiation and evolutionary adaptation [4, 5].

21 A fluorescence based approach to molecular counting would be particularly powerful in  
22 single-cell ‘omics’ applications where a low level, such as trace amounts of protein, DNA, or  
23 RNA, must be detected [6, 7]. A reduction or even elimination of the amplification stage  
24 prior to sequencing of DNA or RNA could greatly increase the accuracy and reliability of  
25 single-cell genomic analyses. And since fluorescence microscopy is less susceptible to errors  
26 arising from protein size or abundance than techniques like mass spectroscopy [8], it could  
27 hold a significant advantage for single-cell proteomics.

28 Most conventional microscopy techniques either rely upon observing the step-wise photo-  
29 bleaching of fluorescent labels or on calibrating the fluorescence intensity to a standard  
30 [1, 2, 9]. Although these two methods have provided valuable insight into a range of cellular  
31 phenomena, both have their limitations. Step-wise photobleaching can only be used to  
32 identify small numbers of molecules (roughly  $< 10$ ). And intensity measurements, although  
33 able to quantify the number of more abundant molecules, are hindered by stochastic variation  
34 in photon emission and collection efficiency, and are limited by the dynamic range of the  
35 detection camera. Likewise, both techniques have difficulties when observing diffraction  
36 limited fine structures due to overlapping signal from neighbouring features.

37 Super-resolved localization microscopy (SLM), which include techniques such as PALM  
38 [10] and dSTORM [11], could provide an alternative approach that would not suffer from  
39 these limitations. SLM can produce images of structural detail an order-of-magnitude finer  
40 than diffraction limited techniques. The method relies on precisely localizing the spatial  
41 position of single, fluorescent labels attached to an assembly of target molecules. This

42 typically requires the use of photo-convertible or photo-activatable fluorophores that can be  
43 induced to blink in such a way that only a random subset of the labels are visible during  
44 each frame [12, 13]. For a sufficiently sparse image, each diffraction limited spot should be  
45 sufficiently well separated, and the subset of fluorophores may be localized with a precision  
46 that scales like  $\sim 1/\sqrt{P}$ , where  $P$  is the mean number of photons collected from a single  
47 blink of a fluorophore. Tens of thousands of frames are typically acquired, the spatial  
48 coordinates of the fluorophores within each frame extracted, and the resulting data from the  
49 stack rendered into a final image.

50 Since SLM measures discrete blinks from single fluorescent labels, it essentially provides  
51 a digital approach to molecular counting, compared to conventional techniques that measure  
52 the overall amplitude of a signal, and are akin to an analog method [14–16]. By focusing on  
53 interpreting the number of detected blinks, the usefulness of SLM moves well beyond what  
54 can be achieved with imaging alone. For instance, intracellular elements like multimerized  
55 membrane bound proteins, which are still unresolvable by SLM imaging, could be detected.  
56 Likewise, this approach relaxes the spatial accuracy requirements of imaging, opening the  
57 way for faster detection, at lower signal, and on smaller detector pixel arrays. However, there  
58 are several challenges to obtaining accurate counts with SLM, most notably, accounting for  
59 multiple blinks from a single fluorophore and the inefficiency with which the fluorophores  
60 photo-activate or photo-convert [17, 18]. Both issues lead to an inaccuracy in estimating  
61 the total number of molecules [15, 16, 19], and there has been much effort to mitigate these  
62 difficulties [14–16, 20–25].

63 Starting from the statistics of the observed number of blinks of a single fluorophore,  
64 our approach is to apply Bayesian analysis to estimate the number of molecules from the  
65 total number of blinks detected in an SLM measurement (a related, but distinct approach,  
66 is presented in [26]). We are able to derive an analytic expression both for the estimated  
67 number of molecules and the error in that estimate. In addition, although the stochastic  
68 blinking of the fluorophores can introduce uncertainty when translating between the number  
69 of localizations and the number of molecules, we show that labeling single-molecules with  
70 multiple labels can reduce this uncertainty. As an example, we apply our theory to design  
71 an experiment that measures the cell-to-cell variability of plasmid copy number in bacteria  
72 (a task that has proven to be surprisingly difficult [27]).

## 73 II. METHODS

### 74 A. Counting single molecules from blinking fluorophores

75 Let's begin by calculating the conditional probability distribution  $p(B|N)$  for observing  $B$   
76 blinks (or localizations) from a set of  $N$  fluorophores during a measurement time  $T_M$ . We  
77 assume the only information available is the total number of blinks  $B$ , and ignore any spatial  
78 information contained within the data that might enable us to differentiate one fluorophore  
79 from another. In the simple case of a single emitter, the probability  $p(B|N)$  is often well  
80 approximated by a geometric distribution:

$$p(B|N = 1) = (1 - e^{-1/\lambda})e^{-B/\lambda}, \quad (1)$$

81 where  $\lambda$  is the characteristic number of blinks of a particular fluorophore within the interval  
82  $T_M$ . This distribution arises when the blinking is a Poisson process between an 'on' and an  
83 'off' state that after sufficient time is truncated by photobleaching. From this relationship  
84 we generalize to the case of  $N$  fluorophores to obtain a negative binomial distribution

$$p(B|N) = \binom{B + N - 1}{N - 1} (1 - e^{-1/\lambda})^N e^{-B/\lambda}, \quad (2)$$

85 where the prefactor accounts for the number of ways that  $N$  fluorophores, each blinking some  
86  $B_i$  times, can yield  $\sum_i^N B_i = B$  blinks. The mean and variance of Eq. 2 (see Appendix A)  
87 are:

$$\mu_B = \frac{N}{(e^{1/\lambda} - 1)}, \quad (3)$$

88 and

$$\sigma_B^2 = \frac{\mu_B^2}{N} e^{1/\lambda}, \quad (4)$$

89 respectively.

90 Up until this point, we have been considering the conditional probability distribution  
91  $p(B|N)$ , which, to reiterate, is the probability of observing  $B$  blinks when there are  $N$   
92 fluorophores. However, we wish to know the probability of there being  $N$  fluorophores when  
93 we observe  $B$  blinks, or  $p(N|B)$ . In the language of Bayesian statistics, we need to connect  
94 the likelihood  $p(B|N)$  to the posterior distribution  $p(N|B)$ , which can be achieved by Bayes'  
95 theorem:

$$p(N|B) = \frac{p(B|N)p(N)}{p(B)}. \quad (5)$$

96 If we have no prior knowledge of the distribution of fluorophores in our sample we may set  
97 the prior  $p(N)$  as a constant [28]. The posterior and the likelihood are then proportional  
98  $p(N|B) \propto p(B|N)$ .

99 We define a log likelihood function  $\mathcal{L}(N, B) = -\ln p(B|N) \propto -\ln p(N|B)$  and apply a  
100 Laplace approximation to the posterior distribution. That is, for a sharply peaked, sym-  
101 metric distribution, the maximum with respect to  $N$  (i.e.,  $\partial\mathcal{L}(N, B)/\partial N|_{\mu_N} = 0$ ) should  
102 roughly correspond to the mean number of fluorophores:

$$\mu_N = B(e^{1/\lambda} - 1). \quad (6)$$

103 Likewise, we can obtain the variance in the estimated number of fluorophores, which provides  
104 the accuracy of the estimate, by rewriting the posterior distribution and Taylor expanding  
105 as follows:

$$p(N|B) = e^{-\mathcal{L}(N, B)} \propto e^{-\frac{1}{2} \frac{\partial^2 \mathcal{L}}{\partial N^2} \Big|_{\mu_N} (N - \mu_N)^2}. \quad (7)$$

106 In the exponent of Eq. 7, we identify the estimator of the Fisher information matrix [29]  
107  $\sigma_N^{-2} = \partial^2 \mathcal{L}(N, B)/\partial N^2|_{\mu_N}$  to yield the variance

$$\sigma_N^2 = \frac{\mu_N^2}{B} \frac{e^{1/\lambda}}{e^{1/\lambda} - 1}. \quad (8)$$

108 For fluorophores that blink multiple times during the measurement (i.e., the limit  $\lambda \gg 1$ ),  
109 Eq. 6 simply reduces to the intuitive expression  $\mu_N = B/\lambda$ , which states that the most  
110 likely number of fluorophores is equal to the measured number of blinks divided by the  
111 mean number of blinks per fluorophore. In this limit, Eqs. 6 and 8 approach the Poisson  
112 limit with variance  $\sigma_N^2 = \mu_N$ , and the coefficient of variation (CV), which quantifies the  
113 variability of the estimate relative to the mean ( $\eta \equiv \sigma_N/\mu_N$ ), is simply  $\eta = 1/\sqrt{\mu_N}$ .

## 114 B. Accounting for multiple labels on a target

115 There are a myriad of labeling techniques in cell biology and the correspondence between  
116 the number of fluorophores and the number of target molecules is typically not one to  
117 one. For instance, immunolabeled molecules will contain several dyes on each antibody  
118 and covalently labeled proteins will often be tagged at multiple residues. The probability of  
119 having  $N$  fluorophore labels in total when there are  $M$  target molecules, each with  $h$  possible

120 sites where a fluorophore may bind (or hybridize), is given by the binomial distribution

$$p(N|M) = \binom{hM}{N} \theta^N (1 - \theta)^{hM - N}, \quad (9)$$

121 where  $\theta$  denotes the fractional occupancy. Note that  $hM$  is the maximum number of labels  
122 possible, if we ignore all non-specific labeling, and that the fractional occupancy  $\theta$  is always  
123 less than one.

### 124 C. Distribution of blinks within a population

125 We can now combine Eqs. 2 and 9 as follows:

$$p(B|M) = \sum_N p(B|N)p(N|M), \quad (10)$$

126 to derive the conditional probability distribution for observing  $B$  blinks from a popula-  
127 tion of  $M$  fluorescently labeled molecules. Although the full sum is quite cumbersome, if  
128 straightforward to evaluate numerically, the moments of Eq. 10 are analytically tractable.  
129 For instance, the first and second moments may be found by multiplying both sides of Eq. 10  
130 by  $\sum_B B$  or  $\sum_B B^2$ , respectively, and evaluating the summations. The first moment is the  
131 mean number of blinks

$$\tilde{\mu}_B = \frac{M\theta h}{e^{1/\lambda} - 1}, \quad (11)$$

132 which can be combined with the second moment to obtain the variance

$$\tilde{\sigma}_B^2 = \frac{\tilde{\mu}_B^2}{M\theta h} (e^{1/\lambda} + 1 - \theta). \quad (12)$$

133 However, we wish to estimate the mean and variance in the estimate of the number of  
134 molecules after having measured  $B$  blinks. Although a more formal derivation is provided  
135 in Appendix B, the estimate for the mean can simply be obtained by substituting  $\tilde{\mu}_B \rightarrow B$   
136 and  $M \rightarrow \tilde{\mu}_M$  into Eq. 11:

$$\tilde{\mu}_M = \frac{B(e^{1/\lambda} - 1)}{\theta h}. \quad (13)$$

137 In the limit  $\lambda \gg 1$ , Eq. 13 again yields an intuitive result for the expected number of  
138 molecules  $\tilde{\mu}_M = B/(\lambda\theta h)$ .

139 The variance, on the other hand, is more challenging to evaluate, but it can be estimated,  
140 similar to how one estimates the propagation of errors in a measurement (see Appendix C).

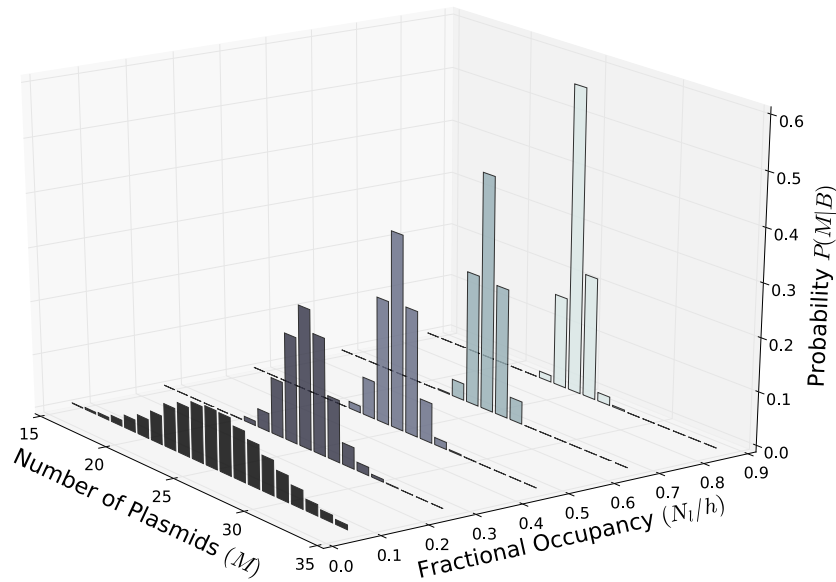

FIG. 1. The simulated probability distribution  $p(M|B)$  for  $(M = 25, \lambda = 2, h = 96)$  at fractional occupancies  $(N_l/h = 0.05, 0.25, 0.45, 0.65, 0.85)$  showing a sharper distribution (i.e., less uncertainty) at increasing values.

141 If we assume the distribution  $p(M|B)$  is peaked about the mean  $\tilde{\mu}_M$ , then the Fisher infor-  
 142 mation matrix is:

$$\tilde{\sigma}_M^2 = \left( \frac{\partial \tilde{\mu}_M}{\partial B} \right)^2 \tilde{\sigma}_B^2, \quad (14)$$

143 to yield our final result for the estimate of the variance

$$\tilde{\sigma}_M^2 = \frac{\tilde{\mu}_M^2 (e^{1/\lambda} + 1 - \theta)}{B (e^{1/\lambda} - 1)}. \quad (15)$$

144 In the limit  $\lambda \gg 1$ , this yields the simpler expression  $\sigma_M^2 = \tilde{\mu}_M^2 (2 - \theta) \lambda / B$ , and the CV is  
 145 simply

$$\tilde{\eta}^2 = \frac{1}{\tilde{\mu}_M} \frac{(2 - \theta)}{\theta h}, \quad (16)$$

146 which can, when  $h > (2 - \theta) / \theta$ , reach the sub-Poissonian limit scaling like one over the  
 147 square root of the mean number of labels per molecule  $\tilde{\eta} \propto 1 / \sqrt{N_l}$ , where  $N_l \equiv \theta h$ . This  
 148 scaling, of course, is simply a result of the central limit theorem.

### 150 III. RESULTS

#### 151 A. Cell-to-cell variability of plasmid copy number

152 To illustrate the utility of our approach, we consider the problem of counting plasmids in  
153 single bacterial cells. Plasmids are circular, extra-chromosomal segments of DNA that often  
154 confer a selective advantage, such as a resistance to antibiotics, to their host. Plasmids  
155 are also a relatively simple way to introduce genes into a cell making them an invaluable  
156 tool throughout molecular and synthetic biology. An important feature of a plasmid is its  
157 copy number. If a plasmid is harbouring a gene one wishes to express at a controlled level,  
158 variations in plasmid number will likely lead to varying levels of expression. Although bulk  
159 techniques such as qPCR can place bounds on the average plasmid copy number, it has  
160 proven extremely difficult to quantify the copy number distribution within a population  
161 [27].

162 Localization microscopy could provide a way to measure the cell-to-cell variability in  
163 copy number. Super resolved localization microscopy images of a high-copy number ColE1  
164 plasmid were recently obtained in fixed *Esheria coli* bacteria [30]. Atto-532 labeled DNA  
165 probes were annealed via DNA fluorescence in situ hybridization (FISH) to an array of LacO  
166 sites (256 sites) introduced in the target plasmids, then imaged by dSTORM. Furthermore,  
167 both the mean number of blinks  $\lambda$  and the fractional occupancy  $\theta$  could be obtained from  
168 *in vitro* measurements (from photoactivation of sparse samples of the dye and from photo-  
169 bleaching experiments on the hybridization of the probes to an array of the target sequence,  
170 respectively).

172 Here we consider targeting a 96 site array (a 96-*TetO* array, for instance, is commonly  
173 available [31]) to lessen the effects of the insert on the replication dynamics of the plas-  
174 mid [32]. Figure 1 shows the probability distribution  $p(M|B)$  for this hypothetical system.  
175 We've chosen  $M = 25$  for illustrative purposes, but the qualitative results remain similar  
176 for different plasmid number (i.e., for increasing fractional occupancies,  $Nl/h = \theta$ , the dis-  
177 tribution becomes increasingly peaked around the expected value). Figure 2 shows that as  
178 more blinks are observed, due to an increased fractional occupancy, for the same number  
179 of plasmids ( $M = 10, 25, 100$ ), the error in the estimate of  $M$  rapidly decreases. As more  
180 probes associate with the plasmids, the coefficient of variation decreases like  $\sim 1/\sqrt{N_l}$ , and



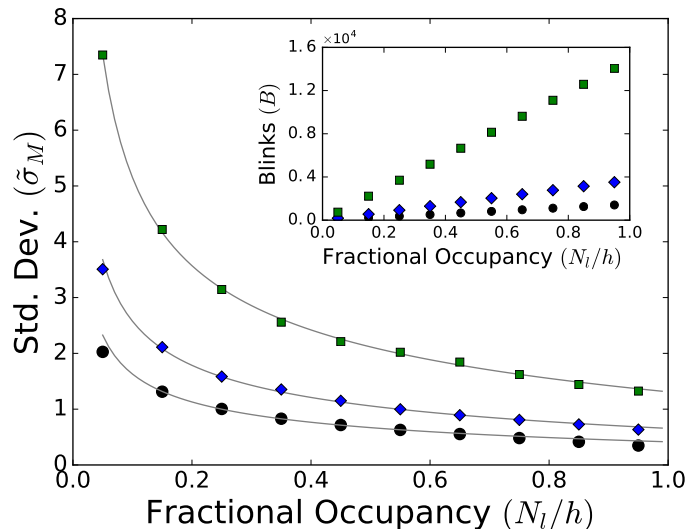

FIG. 2. Uncertainty in the number of molecules vs. fractional occupancy for  $M = 10$  (circles) , 25 (diamonds), and 100 (squares),  $\lambda = 2$  and  $h = 96$ . Solid lines are a theoretical estimate from Eq. 15. The insert shows the increase in the expected number of observed blinks, for these parameters, with increasing fractional occupancy.

181 can be made to drop well below the Poisson limit  $1/\sqrt{M}$  (see Fig. 3). This is illustrated  
 182 for a range of plasmid number (again,  $M = 10, 25, 100$ ). For  $M = 25$ , for instance, and  
 183 a reasonable fractional occupancy as might be achieved by DNA FISH, say 20%, the error  
 184 in a single-cell count would be only  $\pm 1-2$  plasmids. Unfortunately, the efficiency at which  
 185 the probes hybridize in DNA FISH experiments is always hampered by the competing com-  
 186plementary DNA. Perhaps by employing peptide nucleic acid (PNA) probes [33], devoid of  
 187 the negative charge along their backbone, the fractional occupancy could be enhanced to  
 188 further reduce the uncertainty.

## 189 B. Realistic *In silico* single-molecule counting

190 In practice, a range of considerations must be accounted for before the theory we've devel-  
 191 oped above can be applied; the most important consideration being to generate an accurate  
 192 table of single-molecule localizations. To avoid tackling all the complications of SLM count-  
 193 ing concurrently, we first develop a practical approach to molecular counting on simulated  
 194 realizations of an SLM counting experiment. For instance, our theory assumes that all the

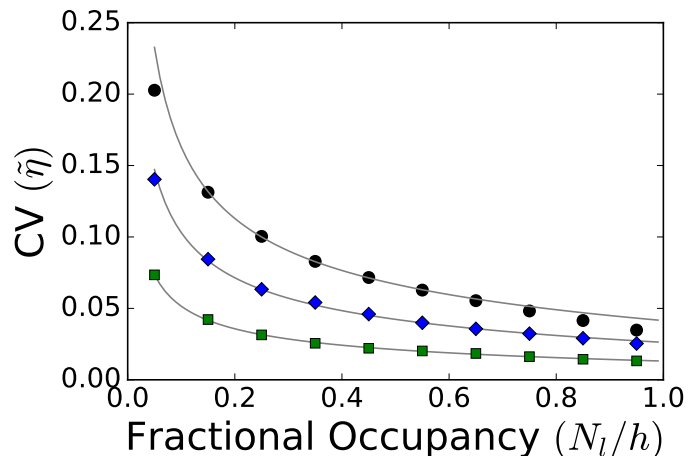

FIG. 3. Coefficient of variation ( $\tilde{\eta}_l$ ) vs. fractional occupancy ( $N_l/h$ ) for different plasmid (molecule) number:  $M = 10$  (circles), 25 (diamonds), 100 (squares) ( $\lambda = 2$  and  $h = 96$ ). The solid lines are the theoretical estimate from Eq. 16. At, roughly,  $M = 10$  the theory begins to deviate from the simulated results.

195 fluorophores blink according to a geometric distribution characterized by a single parameter  
196  $\lambda$ , but if the sample is not homogeneously illuminated, or if the local chemical environment  
197 varies across a sample or with time, this criteria might not hold. Our *in silico* data allows  
198 us to impose temporal and spatial uniformity in the blink statistics. Likewise, *in silico* we  
199 know exactly how many fluorophores we are attempting to count and don't have to calibrate  
200 for a sub-population that refuses to photoswitch (a complication our theory does not incor-  
201 porate). All these issues can be avoided, for the moment, by analyzing simulated images.  
202 The images are then processed to generate a localization table, just as one would process  
203 actual SLM data, and from the resulting localization table we show how to extract molecular  
204 counts according to the theory. In what follows, we essentially model dSTORM data with  
205 an organic dye, and many of the parameters are taken from our experimental setup (e.g.,  
206 pixel size, frame rate, etc.).

208 We model the switching photophysics of each fluorophore as a Poisson process truncated  
209 by a geometric distribution [23]. The Poisson process is an effective model of photo-switching  
210 between an 'on' and an 'off' state by the fluorophore, which is only able to switch a limited  
211 number of times, drawn from a geometric distribution, before photobleaching. We choose an  
212 'on' time  $t_{\text{on}} = 100$  ms and a duty cycle  $t_{\text{on}}/t_{\text{off}} = 10^{-3}$ , which specifies the Poisson dynam-  
213 ics. As to the bleaching dynamics, we set the characteristic number of blinks  $\lambda = 2$ , which

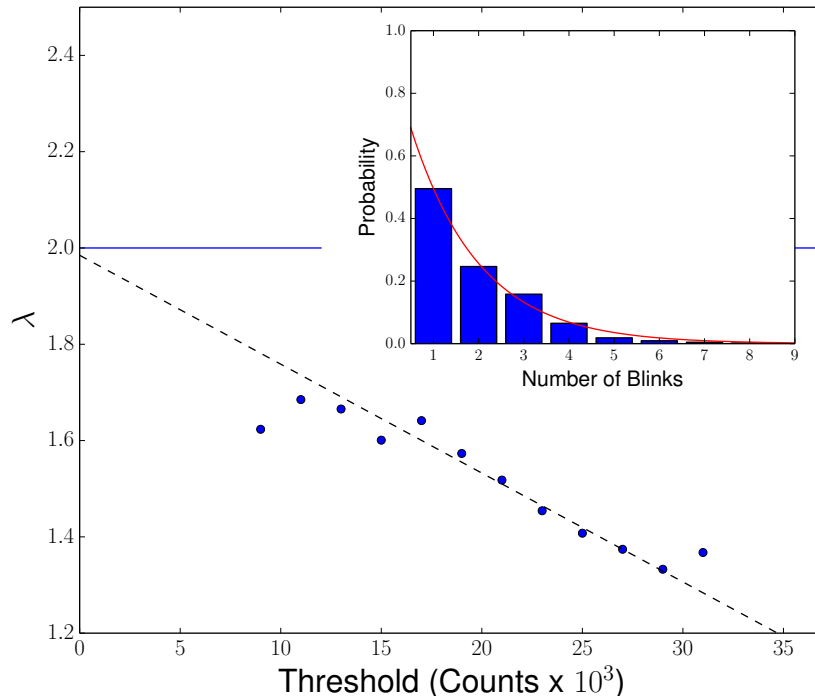

FIG. 4. Plot of  $\lambda$  vs. Threshold. The dashed line is a linear fit to the data points from  $15\text{-}25 \times 10^3$  counts. The solid blue line is the simulated value  $\lambda = 2$ , which well agrees with the extrapolation of the measurements at zero threshold. The insert shows a typical histogram of the number of blinks from a single fluorophore (for this example, the threshold was  $21 \times 10^3$  counts). The red line is the geometric fit from which we extract  $\lambda$ .

214 is a reasonable value [30]. ‘On’ states are rendered with a Gaussian point spread function  
 215 (PSF) of width  $\sigma_{PSF} = 127$  nm and Poissonian, shot noise intensity fluctuations (mean  
 216 1750 photons/frame). Individual blinks are then pixelated by the finite size of the camera  
 217 pixels (1 pixel = 117 nm) and white noise is added to the images to account for background  
 218 (mean = 48, std = 10, photons). Finally, the dynamics, evaluated at 1 ms time-steps, are  
 219 discretized into 50 ms frames to provide a stack of *in silico* data for processing.

220 Despite knowing the exact value of  $\lambda$  (since it’s a parameter in the simulation), we first  
 221 attempt to measure  $\lambda$  as one might in an actual experiment. We start with a grid of 1156  
 222 fluorophores each spaced 7 pixels apart, and the simulation is run for a total simulated time  
 223 of 12.5 minutes, which yields 15,000 images in the stack. The images are then analyzed with  
 224 RapidStorm (a popular, open-source package for localization microscopy [34]) using fixed-

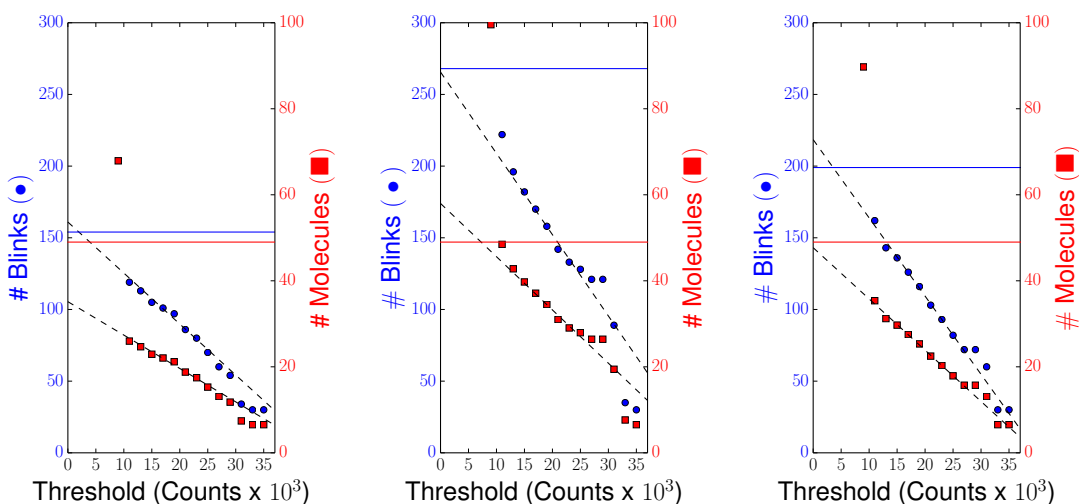

FIG. 5. Total Number of Blinks (Molecules) vs. Threshold for three realizations of the *in silico* experiment. In each figure, the blue circles (red squares) are the measured number of blinks (molecules) at each value of the threshold. The solid blue (red) line are the actual number of blinks (molecules). Dashed lines are linear extrapolations of the data fit to a threshold range of  $15\text{-}25 \times 10^3$  counts.

225 width Gaussian fits to the PSF. Once we have built an initial table of localizations, we then  
226 identify blinks that last for multiple frames as a single blink of a fluorophore by associating  
227 all temporally, consecutive localizations within a radius of 100 nm [35]. Since the initial grid  
228 of fluorophores is well separated, we can now build a histogram of the number of blinks from  
229 a single fluorophore and fit to obtain  $\lambda$ . An example of the resulting distributions is shown  
230 in the inset to Fig. 4.

232 Note, the total number of localizations is sensitive to the choice of threshold, which  
233 in RapidStorm is the integrated number of camera counts (here, 47 counts/photon) within  
234 the fitted PSF. For too low a threshold, it becomes difficult to differentiate a blink of the  
235 fluorophore from background noise. In fact, setting too low a threshold will generate a  
236 localization table with many spurious, random localizations. Our solution is to evaluate  $\lambda$   
237 at increasing thresholds and extrapolate to the zero threshold value. That is, at different  
238 thresholds, we build a histogram of the number of blinks from a single fluorophore, fit to a  
239 geometric distribution to obtain  $\lambda$ , then plot  $\lambda$  vs. threshold. For a range of intermediate  
240 thresholds,  $\lambda$  steadily decreases as the threshold is increased. As shown in Fig. 4, linearly

241 extrapolating the data to zero threshold gives excellent agreement with the value we explic-  
242 itly coded into the simulation (1.98 compared to 2).

243 With this calibration in hand, we next turn our attention to the actual *in silico* molecular  
244 counting experiment. We build a grid of 1225 vertices, each 8 pixels apart, and scatter about  
245 each vertex (within a radius of 2 pixels) up to  $h = 4$  fluorophores (the actual number chosen  
246 from a binomial distribution with fractional occupancy  $\theta = 0.75$ ). The procedure is simi-  
247 lar to our calibration experiment: we simulate the system for 15,000 frames with the same  
248 parameters as before, analyze the stack in RapidStorm, bunch together blinks that last for  
249 multiple frames, and repeat at increasing threshold. To obtain the total number of blinks  $B$ ,  
250 we determine the total number of blinks at each threshold, and again linearly extrapolate  
251 to zero threshold (see Fig. 5). This result can be used in Eq. 13 and Eq. 15 to obtain the  
252 mean number of molecules  $\tilde{\mu}_M$  and the variance  $\tilde{\sigma}_M^2$  of our estimate. Alternatively, we could  
253 directly plot Eq. 13 and again extrapolate to zero threshold (see Fig. 5).

254 From 25 realizations of this experiment, our measurements yielded  $\tilde{\mu}_M = 45 \pm 9$  molecules  
255 with the actual number of molecules fixed at 49. The error on our estimate is slightly larger  
256 than our theoretical estimate from Eq. 15 ( $\tilde{\sigma}_M = 5.6 \pm 0.6$ ), but this is largely due to the  
257 inherent error in extrapolating the data to zero threshold. Regardless, our estimate on the  
258 molecular count is still within 20%, which is not bad considering the stochastic nature of  
259 the system we've considered. Note, as the background noise is increased, it will become  
260 increasingly difficult to reliably extract the localizations and may make the approach we've  
261 just presented impractical. Likewise, the density of labels we consider in this section is still  
262 relatively sparse. In dense samples (or in samples where one might want to rapidly acquire  
263 the data by reducing the 'off' time), it may be hard to guarantee that the blinks don't over-  
264 lap within a frame, skewing our estimates of the total number of blinks. Improved software  
265 for localizing single-molecules, in noisy and/or dense samples, may help limit these artifacts  
266 [36, 37].

#### 267 IV. DISCUSSION

268 Our approach relies upon an accurate measure of two parameters: the mean number of blinks  
269 from a single fluorophore ( $\lambda$ ) during the measurement time, and the fractional occupancy  
270 ( $\theta$ ). Although it is by no means certain, as a starting point, lets assume that *in vitro*

271 measures of these parameters are accurate. The parameter  $\lambda$  can be obtained from imaging  
272 single blinking fluorophores sparsely attached to a coverslip. Of course, inherent in this  
273 measurement is the assumption that the blink statistics are both spatially uniform and  
274 temporally invariant across the sample (or, at least, the region of interest). It should be  
275 kept in mind that this is not always the case: flat-field illumination is a challenge, densely  
276 packed labels may interact through charge/energy transfer, there may be pH and other local  
277 environmental variations, and so on.

278 Obtaining the fractional occupancy is another challenge [38]. One method is to count  
279 photobleaching steps of single labeled probes bound to a target. In our plasmid example,  
280 the actual 96-*TetO* repeat target is much too large for such an approach, but it's reasonable  
281 to assume that a smaller (say, 10-15 repeat target) would extrapolate. Although this would  
282 provide the full distribution of the occupancy, a simpler strategy is to measure the resulting  
283 ratio of plasmid DNA to fluorophore labels (by absorption spectroscopy and fluorometry,  
284 respectively). The fractional occupancy can then be backed out of the underlying binomial  
285 distribution. Of course, a binomial distribution is only an approximation to the occupancy  
286 statistics, and assumes that it's equally likely for a labeled probe to associate with any one  
287 of the complementary binding sites along the plasmid. If the probes were to interact (e.g.,  
288 electrostatic or steric interactions), for example, the underlying distribution may be more  
289 complicated than our simple model assumes.

290 Moreover, as mentioned, many fluorophores do not efficiently photo-activate or -convert.  
291 One might be able to account for this aspect of the photophysics by quantifying the  
292 fractional occupancy using DNA origami [39]. For instance, in our plasmid example, an  
293 array of *TetO* sequences that could be spatially resolved by localization microscopy (e.g.,  
294 patterned on a grid) would serve as a template. Inefficient photo-activation or -switching will  
295 simply lead to a reduced, measure of the fractional occupancy. Given a sufficient number of  
296 hybridization sites  $h$ , this should account for any underestimation in the molecular number  
297 due to inefficient photoswitching. In fact, an added advantage of labeling the actual plasmids  
298 with multiple labels is that the redundancy increases the odds that a signal will be received  
299 from each molecule. Finally, the reliability of *in vitro* measurements of the theoretical  
300 parameters could be tested. The fractional occupation could alternatively be measured *in*  
301 *vivo* by working with a low copy plasmid that could be spatially resolved via conventional  
302 microscopy, then performing a photobleach experiment to determine the number of probes

303 hybridized to a single plasmid.

304 We have also shown that, by increasing the number of labels on a target, one can take  
305 advantage of the central-limit theorem to improve on the accuracy of a molecular count,  
306 to achieve a  $\sqrt{N_l}$  improvement in the uncertainty of the estimated count (where  $N_l$  is the  
307 mean number of labels per molecule). This approach is well adapted for counting plasmids  
308 because standard techniques for detecting specific DNA sequences, such as DNA FISH,  
309 require labeling with many fluorophore conjugated probes. However, the example is rather  
310 specialized, and it's often not feasible to attach multiple fluorophores to a single-molecule,  
311 such as when directly expressing fluorescently tagged proteins. On the other hand, standard  
312 immunolabeling techniques regularly target proteins with multiply labeled, fluorescently  
313 conjugated antibodies in order to achieve good signal intensity. Redundant labeling would  
314 reduce the uncertainty in quantifying the number of molecular components within diffraction  
315 limited clusters or aggregates via this commonly employed imaging technique.

## 316 **Appendix A: Negative binomial distribution**

317 Identifying Eq. 2 as a negative binomial distribution, the mean and variance can easily be  
318 derived from the moment generating function:

$$\Gamma(t) = \frac{(pe^t)^N}{[1 - (1-p)e^t]^N}, \quad (\text{A1})$$

319 where  $t$  is a dummy variable and, for consistency with Eq. 2,  $p = 1 - e^{-1/\lambda}$ . The  $k^{\text{th}}$  moment  
320 is solved for by evaluating  $\partial^k \Gamma(t) / \partial t^k \big|_{t=0}$ . From the first two moments, we once again obtain  
321 Eqs. 3 and 4 for the mean and variance, respectively.

## 322 **Appendix B: Derivation of the mean number of plasmids**

323 To derive equation 13, we begin by expressing  $p(M|B)$  analogous to Eq. 10 as

$$p(M|B) = \sum_N p(M|N)p(N|B). \quad (\text{B1})$$

324 To calculate the mean, we can multiply both sides by  $\sum_M M$  such that

$$\tilde{\mu}_M = \sum_N \left( \sum_M M p(M|N) \right) p(N|B) \quad (\text{B2})$$

325 We approximate the term in brackets with an estimate of the expectation value of  $p(M|N)$ ,  
326 which is  $N/(\theta h)$ . This leaves

$$\tilde{\mu}_M = \frac{1}{\theta h} \sum_N N p(N|B), \quad (\text{B3})$$

327 where the remaining sum is identified as  $\mu_N$ . Substituting the expression we derived in Eq. 6  
328 yields Eq. 13.

### 329 **Appendix C: Accuracy of the estimate**

330 If we Taylor expand the log likelihood function  $\mathcal{L}(M, B) = -\ln p(M|B)$ , assuming the  
331 distribution to be peaked about  $\tilde{\mu}_B$ , we can relate the log likelihood function to the variance  
332 in the measured number of blinks [28]:

$$\tilde{\sigma}_B^{-2} = \partial^2 \mathcal{L}(M, B) / \partial B^2 \Big|_{\tilde{\mu}_B}. \quad (\text{C1})$$

333 However, we are interested in calculating the variance in the number of molecules  $\tilde{\sigma}_M^2$ , so let's  
334 assume that the probability distribution  $p(M|B)$  is also peaked about  $\tilde{\mu}_M$ , and approximate  
335 its functional dependence as a Gaussian centred at  $\tilde{\mu}_M$  with variance  $\tilde{\sigma}_M^2$  (i.e., Laplace  
336 approximation). In this case, the log likelihood function may be expressed as follows:

$$\mathcal{L}(M, B) = -\frac{(M - \tilde{\mu}_M)^2}{2\tilde{\sigma}_M^2} - \frac{1}{2} \ln \tilde{\sigma}_M^2. \quad (\text{C2})$$

337 Since  $\tilde{\mu}_M$  and  $\tilde{\sigma}_M^2$  are both functions of  $B$ , we can evaluate the second derivative of Eq. C2  
338 to obtain:

$$\frac{\partial^2 \mathcal{L}(p, B)}{\partial B^2} \Big|_{\tilde{\mu}_B} \approx \left( \frac{\partial \tilde{\mu}_M(B)}{\partial B} \right)^2 \Big|_{\tilde{\mu}_B} / \tilde{\sigma}_M^2(B) \Big|_{\tilde{\mu}_B}. \quad (\text{C3})$$

339 Combining this result with Eq. C1 and solving for  $\tilde{\sigma}_M^2$  yields Eq. 14.

### 340 **ACKNOWLEDGMENTS**

341 This work was funded by the Natural Sciences and Engineering Research Council of Canada  
342 [J.N.M., D.N., A.Z.], an Early Researcher Award from the Ministry of Research and Inno-  
343 vation [J.N.M., N.R.], the Human Frontier Science Program [Y.W.], and by the Arkansas  
344 Biosciences Institute, the major research component of the Arkansas Tobacco Settlement  
345 Proceeds Act of 2000 [Y.W.]



346

## 347 AUTHOR CONTRIBUTIONS

348 D.N., Y.W. and J.N.M. conceived of the study. D.N., N.R. and J.N.M. performed the sim-  
349 ulations. D.N., J.N.M., and A.Z. developed the analytical theory. All authors contributed  
350 to writing the manuscript.

351

- 
- 352 [1] V. C. Coffman and J.-Q. Wu, *Trends in Biochemical Sciences* **37**, 499 (2012).
- 353 [2] J. S. Verdaasdonk, J. Lawrimore, and K. Bloom, *Methods in Cell Biology* **123**, 347 (2014).
- 354 [3] M. B. Elowitz, A. J. Levine, E. D. Siggia, and P. S. Swain, *Science (New York, N.Y.)* **297**,  
355 1183 (2002).
- 356 [4] A. Raj and A. van Oudenaarden, *Cell* **135**, 216 (2008).
- 357 [5] A. Eldar and M. B. Elowitz, *Nature* **467**, 167 (2010).
- 358 [6] D. Wang and S. Bodovitz, *Trends in Biotechnology* **28**, 281 (2010).
- 359 [7] C. Gawad, W. Koh, and S. R. Quake, *Nature Reviews Genetics* **17**, 175 (2016).
- 360 [8] G. Zhang, B. M. Ueberheide, S. Waldemarson, S. Myung, K. Molloy, J. Eriksson, B. T. Chait,  
361 T. A. Neubert, and D. Fenyo, *Methods in Molecular Biology* **673**, 211 (2010).
- 362 [9] V. C. Coffman and J.-Q. Wu, *Molecular Biology of the Cell* **25**, 1545 (2014).
- 363 [10] E. Betzig, G. H. Patterson, R. Sougrat, O. W. Lindwasser, S. Olenych, J. S. Bonifacino,  
364 M. W. Davidson, J. Lippincott-Schwartz, and H. F. Hess, *Science (New York, N.Y.)* **313**,  
365 1642 (2006).
- 366 [11] S. van de Linde, A. Loschberger, T. Klein, S. Heidreder, S. Wolter, Hei, and M. Sauer, *Nature*  
367 *Protocols* **6**, 991 (2011).
- 368 [12] S. van de Linde and M. Sauer, *Chemical Society Reviews* **43**, 1076 (2014).
- 369 [13] M. A. Thompson, M. D. Lew, and W. E. Moerner, *Annual Review of Biophysics* **41**, 321  
370 (2012).
- 371 [14] P. Annibale, S. Vanni, M. Scarselli, U. Rothlisberger, and A. Radenovic, *PloS ONE* **6**, e22678  
372 (2011).
- 373 [15] H. Deschout, A. Shivanandan, P. Annibale, M. Scarselli, and A. Radenovic, *Histochemistry*  
374 *and Cell Biology* **142**, 5 (2014).

- 375 [16] S.-H. Lee, J. Y. Shin, A. Lee, and C. Bustamante, Proceedings of the National Academy of  
376 Sciences **109**, 17436 (2012).
- 377 [17] A. Shivanandan, H. Deschout, M. Scarselli, and A. Radenovic, FEBS Letters **588**, 3595  
378 (2014).
- 379 [18] N. Durisic, L. Laparra-Cuervo, A. Sandoval-Álvarez, J. S. Borbely, and M. Lakadamyali,  
380 Nature Methods **11**, 156 (2014).
- 381 [19] N. Durisic, L. L. Cuervo, and M. Lakadamyali, Current Opinion in Chemical Biology **20**, 22  
382 (2014).
- 383 [20] C. R. Nayak and A. D. Rutenberg, Biophysical Journal **101**, 2284 (2011).
- 384 [21] G. C. Rollins, J. Y. Shin, C. Bustamante, and S. Pressé, Proceedings of the National Academy  
385 of Sciences of the United States of America **112**, E110 (2014).
- 386 [22] F. Fricke, J. Beaudouin, R. Eils, and M. Heilemann, Scientific Reports **5**, 14072 (2015).
- 387 [23] R. P. J. Nieuwenhuizen, M. Bates, A. Szymborska, K. A. Lidke, B. Rieger, and S. Stallinga,  
388 PloS ONE **10** (2015).
- 389 [24] R. Jungmann, M. S. Avendaño, M. Dai, J. B. Woehrstein, S. S. Agasti, Z. Feiger, A. Rodal,  
390 and P. Yin, Nature Methods **13**, 439 (2016).
- 391 [25] G. Hummer, F. Fricke, and M. Heilemann, Molecular Biology of the Cell ,  
392 DOI:10.1091/mbc.E16 (2016).
- 393 [26] S. Cox, E. Rosten, J. Monypenny, T. Jovanovic-Talisman, D. T. Burnette, J. Lippincott-  
394 Schwartz, G. E. Jones, and R. Heintzmann, Nature Methods **9**, 195 (2011).
- 395 [27] S. Tal and J. Paulsson, Plasmid **67**, 167 (2012).
- 396 [28] P. Nelson, *Physical models of living systems* (W. H. Freeman and Co, 2014).
- 397 [29] L. Wasserman, *All of Statistics A Concise Course in Statistical Inference* (Springer, 2009).
- 398 [30] Y. Wang, Y. Penkul, and J. N. Milstein, Biophysical Journal **11**, 467 (2016).
- 399 [31] “<https://www.addgene.org/17655/>,”.
- 400 [32] M. A. Smith and M. J. Bidochka, Canadian Journal of Microbiology **44**, 351 (1998).
- 401 [33] R. Rocha, R. S. Santos, P. Madureira, C. Almeida, and N. F. Azevedo, Journal of Biotech-  
402 nology **226**, 1 (2016).
- 403 [34] S. Wolter, A. Löschberger, T. Holm, S. Aufmkolk, M.-C. Dabauvalle, S. van de Linde, and  
404 M. Sauer, Nature Methods **9**, 1040 (2012).
- 405 [35] C. Coltharp, R. P. Kessler, J. Xiao, E. Chiang, and D. Holowka, PLoS ONE **7**, e51725 (2012).

- 406 [36] Y. Wang, T. Quan, S. Zeng, and Z.-L. Huang, *Optics Express* **20**, 16039 (2012).
- 407 [37] S. J. Holden, S. Uphoff, and A. N. Kapanidis, *Nature Methods* **8**, 279 (2011).
- 408 [38] K. W. Teng, Y. Ishitsuka, P. Ren, Y. Youn, X. Deng, P. Ge, S. H. Lee, A. S. Belmont, P. R.  
409 Selvin, W. Green, P. Gottlieb, P. Selvin, J. Macklin, R. Patel, C. Gerfen, X. Zhuang, Y. Wang,  
410 G. Rubin, L. Looger, E. L. W-P, and W. Halotag, *eLife* **5**, 8820 (2016).
- 411 [39] J. J. Schmied, A. Gietl, P. Holzmeister, C. Forthmann, C. Steinhauer, T. Dammeyer, and  
412 P. Tinnefeld, *Nature Methods* **9**, 1133 (2012).
